# Supplementary material for: Gut Microbiota Has a Widespread and Modifiable Effect on Host Gene Regulation
Source: PubMed Central journal article supplement (PMC6722422; doi:10.1128/msystems.00323-18), 2019-09-03

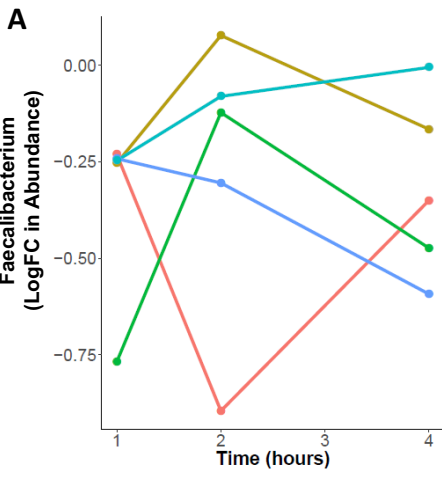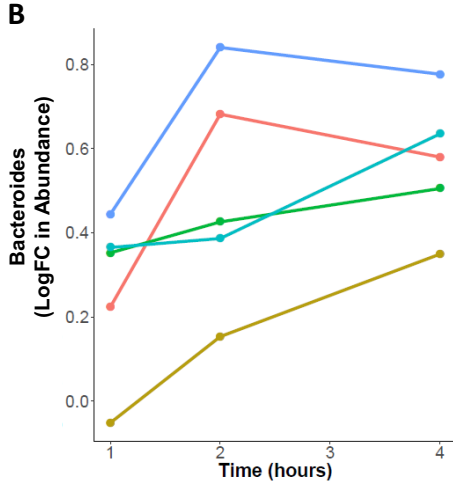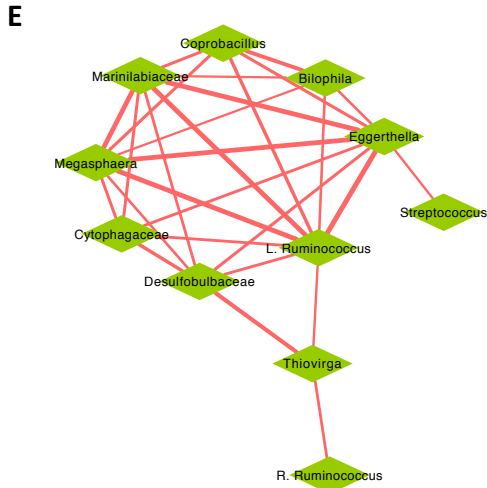

**C**

| Bacteria Taxa                                                            | p-value     | BH adjusted p-value |
|--------------------------------------------------------------------------|-------------|---------------------|
| k_Archaea.p_Euryarchaeota.c_DSEG.o_DHVE3.f_g_                            | 1.55E-09    | 1.73E-07            |
| k_Bacteria.p_Bacteroidetes.c_Bacteroidia.o_Bacteroidales.f_Prevotella_   | 2.59E-07    | 1.45E-05            |
| ceae.g_Prevotella                                                        |             |                     |
| k_Bacteria.p_Bacteroidetes.c_Bacteroidia.o_Bacteroidales.f_Bacteroid_    | 1.61E-05    | 0.000480663         |
| aceae.g_Bacteroides                                                      |             |                     |
| k_Bacteria.p_Cyanobacteria.c_Chloroplast.o_Streptophyta.f_g_             | 1.72E-05    | 0.000480663         |
| k_Bacteria.p_Bacteroidetes.c_Bacteroidia.o_Bacteroidales.f_Porphyro_     | 0.000288621 | 0.006465103         |
| monadaceae.g_Candidatus.Azobacteroides                                   |             |                     |
| k_Bacteria.p_Proteobacteria.c_Betaproteobacteria.o_Burkholderiales.f_    | 0.000960123 | 0.017922301         |
| Comamonadaceae.g_                                                        |             |                     |
| k_Bacteria.p_Firmicutes.c_Clostridia.o_Clostridiales.f_Clostridiaceae.g_ | 0.001734073 | 0.027745174         |
| k_Bacteria.p_Actinobacteria.c_Actinobacteria.o_Bifidobacteriales.f_Bifi_ | 0.003306716 | 0.046294026         |
| dobacteriaceae.g_Bifidobacterium                                         |             |                     |
| k_Bacteria.p_Firmicutes.c_Clostridia.o_Clostridiales.f_Ruminococcacea_   | 0.005076328 | 0.063172086         |
| e.g_Faecalibacterium                                                     |             |                     |
| k_Bacteria.p_Bacteroidetes.c_Bacteroidia.o_Bacteroidales.f_Bacteroid_    | 0.006464096 | 0.065816246         |
| aceae.g_5.7N15                                                           |             |                     |
| k_Bacteria.p_Bacteroidetes.c_Cytophagia.o_Cytophagales.f_Cytophaga_      | 0.006431979 | 0.065816246         |
| ceae.g_                                                                  |             |                     |
| k_Bacteria.p_Proteobacteria.c_Alphaproteobacteria.o_Rhizobiales.f_M_     | 0.008861207 | 0.079584783         |
| ethylobacteriaceae.g_Methylobacterium                                    |             |                     |
| k_Bacteria.p_Verrucomicrobia.c_Verrucomicrobiae.o_Verrucomicrobial_      | 0.009237519 | 0.079584783         |
| es.f_Verrucomicrobiaeae.g_Akkermansia                                    |             |                     |

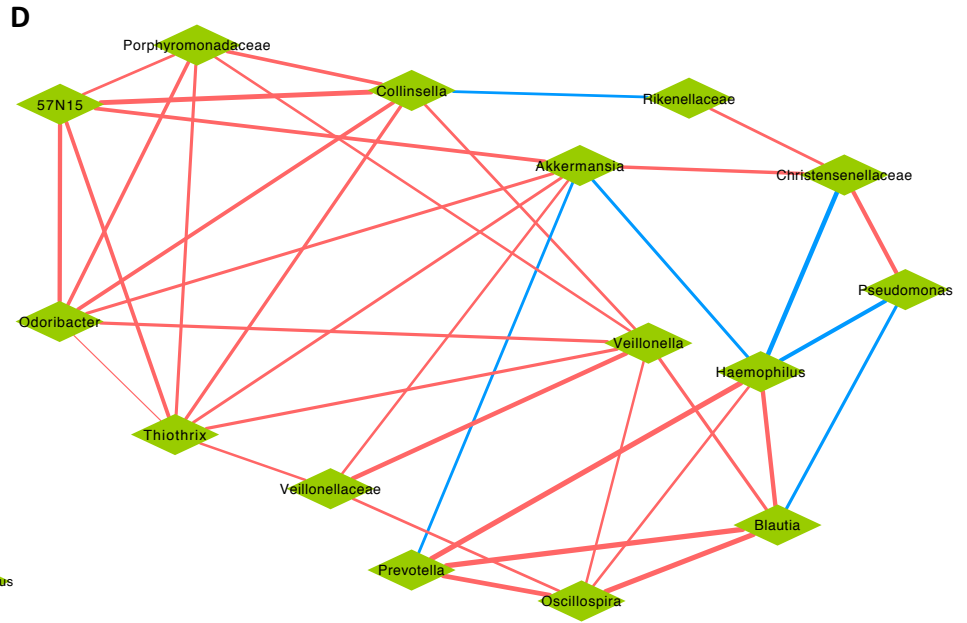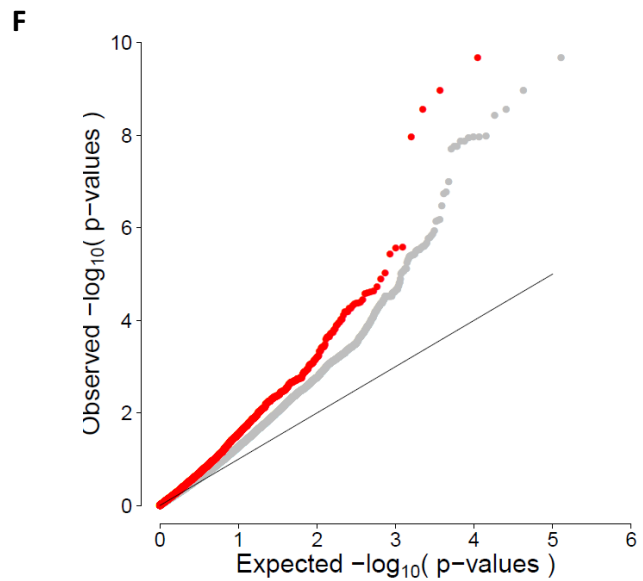

Supplement: mSystems.00323-18-sf002.pdf [file mSystems.00323-18-sf002.pdf]
