# Supplementary material for: Gut Microbiota Has a Widespread and Modifiable Effect on Host Gene Regulation
Source: PubMed Central journal article supplement (PMC6722422; doi:10.1128/msystems.00323-18), 2019-09-03

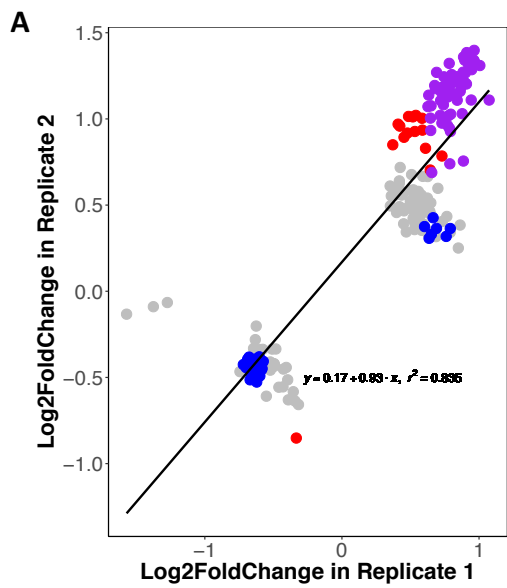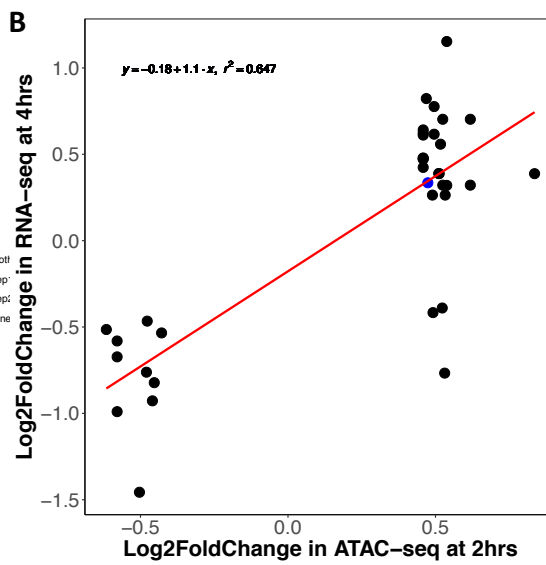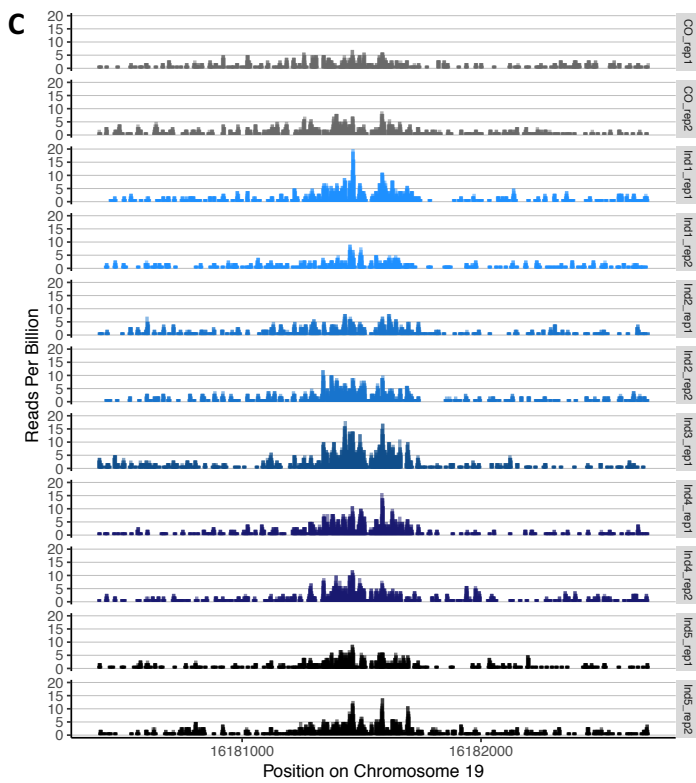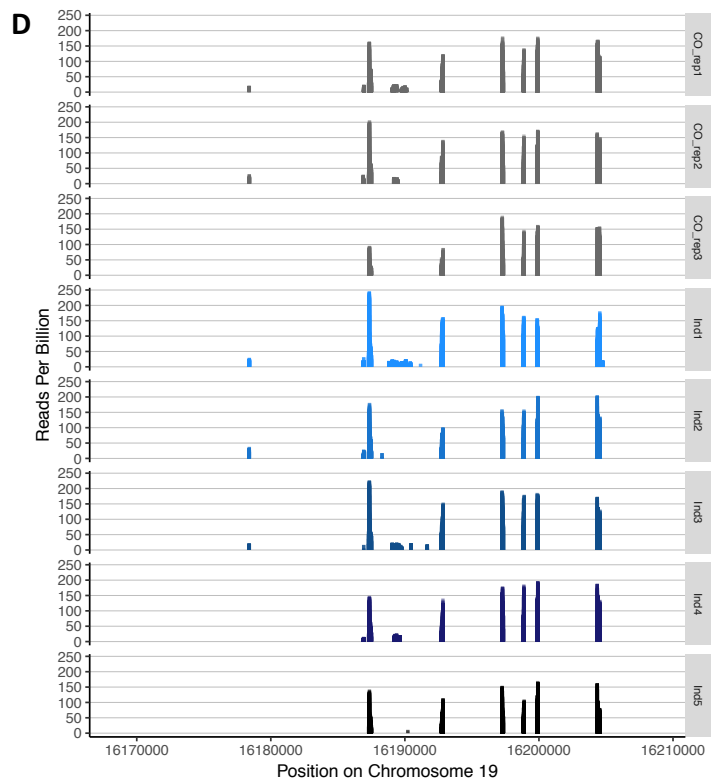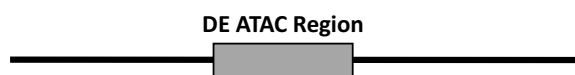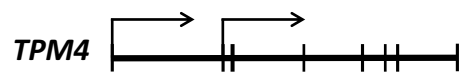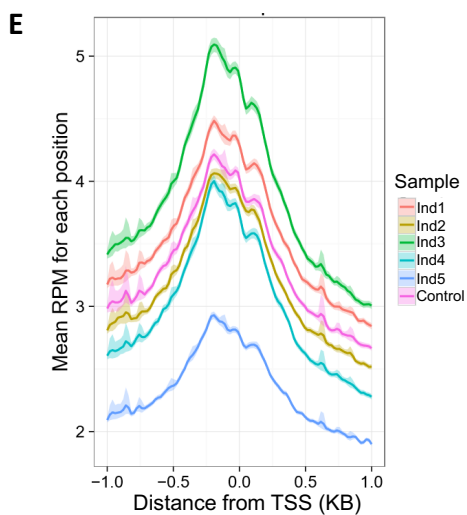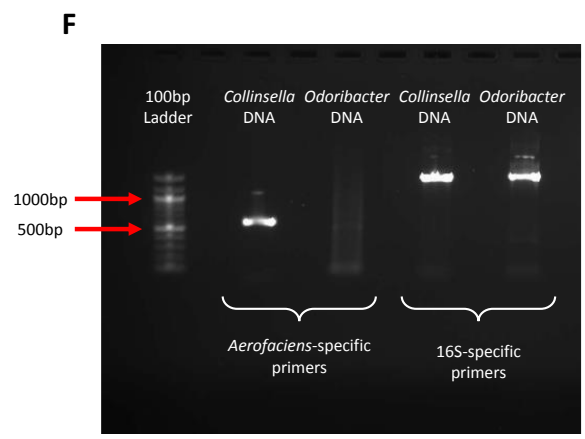

Supplement: mSystems.00323-18-sf003.pdf [file mSystems.00323-18-sf003.pdf]
